# Supplementary material for: Real-world embodied AI through a morphologically adaptive quadruped robot
Source: Springer Nature journal article supplement (doi:10.1038/s42256-021-00320-3), 2021-03-15
Supplement: 42256_2021_320_MOESM1_ESM.pdf [file 42256_2021_320_MOESM1_ESM.pdf]

---

**Supplementary information**

---

**Real-world embodied AI through a  
morphologically adaptive quadruped  
robot**

---

In the format provided by the  
authors and unedited

# Supplementary Materials

## Supplementary Methods

---

**Experiment 1:** Adapting in controlled indoor environments. Stop when sensing a change in terrain, reconfigure the morphology, then start walking again.

---

Start with concrete-specialized morphology (femur 50mm, tibia 20mm)

**repeat**

| Take one step/leg forward, measuring terrain characteristics

| **if** *Non-optimal terrain for current morphology detected* **then**

| | Stop walking

| | Reconfigure to optimal morphology for detected terrain

| **end**

**until** *16 steps/leg has been walked in total;*

---

The robot is initially positioned so that it will take 8 steps on the concrete, before stepping onto the gravel for the last 8 steps.

---

**Experiment 2:** Adapting in realistic outdoor environments - Adapt morphology and measure terrain and performance without stopping.

---

Start with initial morphology (femur 0, tibia 0)

Walk for three steps/leg, measuring terrain characteristics

**repeat**

| Generate predicted map for current terrain from model

| **if** *best predicted neighbor COT > current COT* **then**

| | Start changing morphology to best performing neighbor

| **end**

| **repeat**

| | Take one step/leg

| **until** *new leg lengths are achieved;*

| Walk for three steps/leg, measuring terrain and energy efficiency

| Add measured terrain characteristics and COT to data set

| Regenerate model with newly experienced data point

**until** *96 morphologies tested;*

---

The robot is initially positioned on the grass, before walking onto road, then back on grass. It is manually led onto the next terrain type after 32 morphologies have been tested on each terrain section.

---

**Algorithm 1:** Sensing terrain roughness with the Intel Realsense RGBD camera.

---

Find 3d plane best approximating the point cloud

Inliers = all points within a 35mm distance of the plane

Square error = 0

**for** *all inliers* **do**

| Square error += squared distance between current inlier and plane

**end**

Mean square error = Square error / number of inliers

**if** *More than 30000 inliers:* **then**

| Roughness = Mean square error

**else**

| Roughness = 0

**end**

---

Standard methods from the PCL library are used for plane extraction and segmentation. The RGBD camera used had problems with flat surfaces without discerning visual features, so a roughness of 0 was assumed when a very low number of points were returned by the sensor. The functionality for roughness sensing is mainly implemented in the `pointCloudPlaneFitter.cpp` file in the `terrain_characterizer` repository [60].

---

**Algorithm 2:** Sensing terrain hardness with the Optoforce leg sensors.

---

```
for both front legs do
  for all three axes do
    if current force measurement > 100N then
      | discard measurement
    end
  end

  filtered x-axis force = median(last 5 x-axis measurements)
  filtered y-axis force = median(last 5 y-axis measurements)

  if current z-axis force measurement < 0 then
    | current z-axis force measurement = 0
  end

  filtered z-axis force = median(last 5 z-axis measurements)
end

hardness = 0
for both front legs do
  for all three axes do
    | hardness += max filtered absolute force over last 6 seconds
  end
end
```

---

The force sensors exhibit some high frequency noise, and a median filter of size 5 has been used to reduce it. Erroneous values over 100N are also removed due to being above the nominal capacity of the sensors. Due to the construction of the sensors, it sometimes reports negative forces in the z-direction. These are also filtered away, as they do not reflect actual forces. The full datasheet for the sensors has been uploaded to the dyret-documentation repository [51].

## Supplementary Tables

Supplementary Table 1: Parameters for the gait controller. \* These parameters are linearly scaled as morphology changes, see Supplementary Table 2 for details.

|                |       |
|----------------|-------|
| frequency      | 0.2   |
| lift duration  | 0.15  |
| p0_x           | 0.0   |
| p0_y           | 50.0  |
| p1_x           | 0.0   |
| p1_y           | -80.0 |
| p2_x           | 0.0   |
| p2_y*          | 50.0  |
| p2_z*          | 50.0  |
| p3_x           | 0.0   |
| p3_y*          | -15.0 |
| p3_z*          | 100.0 |
| p4_x           | 0.0   |
| p4_y*          | -80.0 |
| p4_z*          | 50.0  |
| wagPhase       | 0.05  |
| wagAmplitude_x | 25.0  |
| wagAmplitude_y | 75.0  |

Supplementary Table 2: Morphologies and spline scaling for all leg length combinations used in our experiments. Optimal and best trade-off morphologies were found while generating our baseline data set.

| ID | Femur (mm) | Tibia (mm) | Total | Scaling | Comment                                |
|----|------------|------------|-------|---------|----------------------------------------|
| 0  | 0          | 0          | 0     | 100%    | Optimal on gravel                      |
| 1  | 0          | 20         | 20    | 103%    |                                        |
| 2  | 0          | 40         | 40    | 106%    |                                        |
| 3  | 0          | 60         | 60    | 109%    |                                        |
| 4  | 0          | 80         | 80    | 112%    |                                        |
| 5  | 12.5       | 0          | 12.5  | 103%    |                                        |
| 6  | 12.5       | 20         | 32.5  | 106%    |                                        |
| 7  | 12.5       | 40         | 52.5  | 109%    |                                        |
| 8  | 12.5       | 60         | 72.5  | 113%    |                                        |
| 9  | 12.5       | 80         | 92.5  | 116%    |                                        |
| 10 | 25         | 0          | 25    | 106%    |                                        |
| 11 | 25         | 20         | 45    | 109%    |                                        |
| 12 | 25         | 40         | 65    | 113%    |                                        |
| 13 | 25         | 60         | 85    | 116%    |                                        |
| 14 | 25         | 80         | 105   | 119%    |                                        |
| 15 | 37.5       | 0          | 37.5  | 109%    | Best trade-off for all surfaces        |
| 16 | 37.5       | 20         | 57.5  | 113%    |                                        |
| 17 | 37.5       | 40         | 77.5  | 116%    |                                        |
| 18 | 37.5       | 60         | 97.5  | 119%    |                                        |
| 19 | 37.5       | 80         | 117.  | 122%    | Optimal on sand<br>Optimal on concrete |
| 20 | 50         | 0          | 50    | 113%    |                                        |
| 21 | 50         | 20         | 70    | 116%    |                                        |
| 22 | 50         | 40         | 90    | 119%    |                                        |
| 23 | 50         | 60         | 110   | 122%    |                                        |
| 24 | 50         | 80         | 130   | 125%    |                                        |

Supplementary Table 3: Terrain characteristics of the three materials present in the indoor terrain boxes, shown with median and interquartile range.

|          | Roughness (mm <sup>2</sup> ) |      |      | Hardness (N) |      |       |
|----------|------------------------------|------|------|--------------|------|-------|
|          | Median                       | IQR  | Max  | Median       | IQR  | Max   |
| Concrete | 5.1                          | 7.6  | 14.0 | 135.5        | 13.3 | 155.2 |
| Sand     | 25.2                         | 18.5 | 63.9 | 61.3         | 8.2  | 82.8  |
| Gravel   | 35.7                         | 12.8 | 58.1 | 85.7         | 24.9 | 119.7 |

Supplementary Table 4: Values and ranges for all sensors used on the robot. \* This is the nominal range, and the sensor can return values outside of this, depending on calibration.

| Sensor                      | Measurement           | Rate (Hz) | Unit | Value       |
|-----------------------------|-----------------------|-----------|------|-------------|
| Servo (x 12)                | Current               | 100       | A    | [-9.2, 9.2] |
| Optoforce leg sensors (x 4) | Force x-direction     | 100       | N    | *[-40, 40]  |
|                             | Force y-direction     | 100       | N    | *[-40, 40]  |
|                             | Force z-direction     | 100       | N    | *[0, 80]    |
| Realsense depth camera      | 3D point cloud        | 6         | mm   |             |
| Motion Capture rig          | Position, x-direction | 100       | m    | [0, 8]      |
|                             | Position, y-direction | 100       | m    | [0, 8]      |
|                             | Position, z-direction | 100       | m    | [0, 6]      |
| RTK GPS                     | Position, x-direction | 8         | m    |             |
|                             | Position, y-direction | 8         | m    |             |

Supplementary Table 5: Regression parameters for models trained on the indoor data set. Linear regression from the Scikit Learn library was used to generate and deploy the models. Femur and tibia are measured in mm, roughness in mm<sup>2</sup>, and hardness in N.

| Femur | Tibia | independent term | roughness | hardness | roughness <sup>2</sup> | roughness * hardness | hardness <sup>2</sup> |
|-------|-------|------------------|-----------|----------|------------------------|----------------------|-----------------------|
| 0     | 0     | 23.111           | -0.292    | 0.124    | 0.011                  | -0.001               | 0                     |
| 0     | 20    | 101.816          | -5.604    | -0.392   | 0.085                  | 0.023                | 0                     |
| 0     | 40    | -34.391          | 2.236     | 0.903    | -0.028                 | -0.012               | -0.03                 |
| 0     | 60    | -34.656          | 2.999     | 0.513    | -0.049                 | -0.005               | -0.001                |
| 0     | 80    | 42.523           | -0.835    | -0.218   | 0.022                  | 0.003                | 0.001                 |
| 12.5  | 0     | -93.561          | 4.471     | 1.636    | -0.065                 | -0.017               | -0.006                |
| 12.5  | 20    | 51.254           | -1.030    | -0.495   | 0.015                  | 0.008                | 0.002                 |
| 12.5  | 40    | 64.163           | -0.607    | -1.038   | -0.009                 | 0.018                | 0.005                 |
| 12.5  | 60    | -47.784          | 1.681     | 1.251    | -0.019                 | -0.007               | -0.006                |
| 12.5  | 80    | -160.639         | 3.238     | 2.799    | -0.017                 | -0.021               | -0.011                |
| 25    | 0     | -62.823          | 2.991     | 1.040    | -0.034                 | -0.012               | -0.003                |
| 25    | 20    | 11.706           | -0.204    | 0.296    | -0.009                 | 0.009                | -0.002                |
| 25    | 40    | -98.220          | 4.566     | 1.426    | -0.045                 | -0.021               | -0.004                |
| 25    | 60    | 126.911          | -2.581    | -1.117   | 0.008                  | 0.021                | 0.002                 |
| 25    | 80    | 77.427           | -1.355    | -0.713   | 0.008                  | 0.010                | 0.002                 |
| 37.5  | 0     | -27.108          | 1.801     | 0.626    | -0.023                 | -0.006               | -0.002                |
| 37.5  | 20    | 1.300            | 1.180     | 0.223    | -0.011                 | -0.004               | -0.001                |
| 37.5  | 40    | 29.676           | 0.633     | -0.405   | -0.009                 | 0.002                | 0.002                 |
| 37.5  | 60    | -18.316          | 0.874     | 0.625    | -0.009                 | -0.001               | -0.002                |
| 37.5  | 80    | -32.512          | 1.157     | 0.914    | -0.008                 | -0.006               | -0.004                |
| 50    | 0     | 23.989           | -0.111    | -0.065   | -0.008                 | 0.009                | 0                     |
| 50    | 20    | -34.658          | 0.788     | 1.175    | -0.005                 | -0.004               | -0.006                |
| 50    | 40    | 43.179           | -0.147    | -0.449   | -0.003                 | 0.005                | 0.002                 |
| 50    | 60    | -55.32           | 1.509     | 1.382    | -0.014                 | -0.007               | -0.006                |
| 50    | 80    | 60.060           | -1.578    | 0.022    | 0.009                  | 0.011                | -0.003                |
